# Supplementary material for: Assessment of kinship detection using RNA-seq data
Source: PubMed Central journal article supplement (PMC6868348; doi:10.1093/nar/gkz776), 2019-09-10
Supplement: gkz776_supplemental_file.pdf [file gkz776_supplemental_file.pdf]

## Supplementary Material for

### Assessment of kinship detection using RNA-seq data

#### Authors

Natalia Blay<sup>1,2,3</sup>, Eduard Casas<sup>1,2,4</sup>, Iván Galván-Femenía<sup>1,5</sup>, Jan Graffelman<sup>6,7</sup>, Rafael de Cid<sup>1,5</sup>, Tanya Vavouri<sup>1,2</sup>

#### Affiliations

1. Program for Predictive and Personalized Medicine of Cancer, Germans Trias i Pujol Research Institute (PMPPC-IGTP), Badalona, Spain
2. Josep Carreras Leukaemia Research Institute (IJC), Campus ICO-Germans Trias i Pujol, Universitat Autònoma de Barcelona, Badalona, Spain
3. Masters Programme in Bioinformatics and Biostatistics, Universitat Oberta de Catalunya (UOC), Barcelona, Spain
4. Doctoral Programme in Biomedicine, Universitat de Barcelona, Barcelona, Spain
5. Genomes for Life - GCAT lab Group - Germans Trias i Pujol Research Institute, Can Ruti Campus, Ctra de Can Ruti, Camí de les Escoles s/n, Badalona, Barcelona, Spain.
6. Department of Statistics and Operations Research Universitat Politècnica de Catalunya, Barcelona, Spain.
7. Department of Biostatistics, University of Washington, Seattle, USA.

Corresponding author: Tanya Vavouri [tvavouri@carrerasresearch.org](mailto:tvavouri@carrerasresearch.org)

#### This PDF file includes:

Supplementary Table 1  
Supplementary Table 2  
Supplementary Table 3  
Supplementary Figure 1  
Supplementary Figure 2  
Supplementary Figure 3  
Supplementary Figure 4  
Supplementary Figure 5  
Supplementary Figure 6

**Supplementary Table 1.** Source and identifiers of publicly available datasets used in the manuscript.

| <i>Data type</i> | <i>Identifier / accession #</i>                                                                                                                                                                                                            | <i>Reference</i>                                                                                                             | <i>Usage in the manuscript</i>                                                                                                                                                          |
|------------------|--------------------------------------------------------------------------------------------------------------------------------------------------------------------------------------------------------------------------------------------|------------------------------------------------------------------------------------------------------------------------------|-----------------------------------------------------------------------------------------------------------------------------------------------------------------------------------------|
| RNA-seq          | SRR1258217<br>SRR1258218<br>SRR1258219<br>SRR1258220<br>SRR1258221<br>SRR1258222<br>SRR1258223<br>SRR1258224<br>SRR1258225<br>SRR1258226<br>SRR1258227<br>SRR1258228<br>SRR1258229<br>SRR1258230<br>SRR1258231<br>SRR1258232<br>SRR1258233 | Li <i>et al.</i> , Am J Hum Genet, 2014.<br><br>Data retrieved from Gene Expression Omnibus record GSE56961.                 | Kinship detection using RNA-seq data from the 17-member CEPH-UTAH family 1463.                                                                                                          |
| RNA-seq          | SRR9070085<br>SRR9070086<br>SRR9070087<br>SRR9070088<br>SRR9070089<br>SRR9070090<br>SRR9070091<br>SRR9070092<br>SRR9070093                                                                                                                 | Gifford <i>et al.</i> Science, 2019.<br><br>Data retrieved from Gene Expression Omnibus record GSE131322.                    | Kinship detection using RNA-seq data from iPSC-derived cardiomyocytes from a trio. Three replicates per sample.                                                                         |
| RNA-seq          | SRR7739176<br>SRR7739177<br>SRR7739178<br>SRR7739179<br>SRR7739180<br>SRR7739181<br>SRR7739182<br>SRR7739183<br>SRR7739184<br>SRR7739185<br>SRR7739186                                                                                     | Oda <i>et al.</i> Front Immunol 2019.<br><br>Data retrieved from Gene Expression Omnibus record GSE118901                    | Kinship detection using RNA-seq data from whole blood and peripheral blood mononuclear cells from 1 parent, 1 offspring and 3 unrelated individual with 1-2 replicates per sample.      |
| RNA-seq          | SRR6926729<br>SRR6926730<br>SRR6926731<br>SRR6926732<br>SRR6926733<br>SRR6926734<br>SRR6926735<br>SRR6926736<br>SRR6926737<br>SRR6926738<br>SRR6926739                                                                                     | Boutboul <i>et al</i> J Clin Invest 2018.<br><br>Data retrieved from Gene Expression Omnibus records GSE112706 and GSE112707 | Kinship detection using AmpliSeq (targeted RNA-seq) data from Naive CD4+ cells and LPS-stimulated monocytes from 8 unrelated individuals and two siblings with 2 replicates per sample. |

|           |                                                                                                                                                                                                                                                                                                                                                                |                                                       |                                                                                                                           |
|-----------|----------------------------------------------------------------------------------------------------------------------------------------------------------------------------------------------------------------------------------------------------------------------------------------------------------------------------------------------------------------|-------------------------------------------------------|---------------------------------------------------------------------------------------------------------------------------|
|           | <p>SRR6926740<br/>SRR6926741<br/>SRR6926742<br/>SRR6926743<br/>SRR6926744</p> <p>SRR6926281<br/>SRR6926282<br/>SRR6926283<br/>SRR6926284<br/>SRR6926285<br/>SRR6926286<br/>SRR6926287<br/>SRR6926288<br/>SRR6926289<br/>SRR6926290<br/>SRR6926291<br/>SRR6926292<br/>SRR6926293<br/>SRR6926294<br/>SRR6926295<br/>SRR6926296<br/>SRR6926297<br/>SRR6926298</p> |                                                       |                                                                                                                           |
| Genotypes | NA12877<br>NA12878                                                                                                                                                                                                                                                                                                                                             | Eberle, MA <i>et al.</i><br>Genome Res, 2017          | Estimation of genotype prediction accuracy.                                                                               |
| Genotypes | HG02363<br>HG02372<br>HG02377<br>HG02381<br>HG02387<br>HG02388<br>HG02250<br>HG02353<br>HG02371<br>HG02373<br>HG02375<br>HG02386                                                                                                                                                                                                                               | The 1000 Genomes Project Consortium,<br>Nature, 2015. | Kinship detection using simulated RNA-seq data from genotypes from <b>related</b> individuals ( <b>CDX</b> population).   |
| Genotypes | HG00096<br>HG00097<br>HG00099<br>HG00100<br>HG00101<br>HG00102<br>HG00231<br>HG00232<br>HG00233<br>HG00234<br>HG00235                                                                                                                                                                                                                                          | The 1000 Genomes Project Consortium,<br>Nature, 2015. | Kinship detection using simulated RNA-seq data from genotypes from <b>unrelated</b> individuals ( <b>GBR</b> population). |
| Genotypes | HG02133<br>HG02134<br>HG02136<br>HG02137                                                                                                                                                                                                                                                                                                                       | The 1000 Genomes Project Consortium,<br>Nature, 2015. | Kinship detection using simulated RNA-seq data from genotypes from <b>unrelated</b> individuals ( <b>KHV</b> population). |

|           |                                                                                                                       |                                                    |                                                                                                                           |
|-----------|-----------------------------------------------------------------------------------------------------------------------|----------------------------------------------------|---------------------------------------------------------------------------------------------------------------------------|
|           | HG02138<br>HG02139<br>HG01840<br>HG01841<br>HG01842<br>HG01843<br>HG01844                                             |                                                    |                                                                                                                           |
| Genotypes | HG01669<br>HG01602<br>HG01670<br>HG01605<br>HG01765<br>HG01766<br>HG01500<br>HG01501<br>HG01503<br>HG01504<br>HG01506 | The 1000 Genomes Project Consortium, Nature, 2015. | Kinship detection using simulated RNA-seq data from genotypes from <b>unrelated</b> individuals ( <b>IBS</b> population). |
| Genotypes | NA19017<br>NA19019<br>NA19020<br>NA19025<br>NA19026<br>NA19027<br>NA19307<br>NA19308<br>NA19309<br>NA19310<br>NA19312 | The 1000 Genomes Project Consortium, Nature, 2015. | Kinship detection using simulated RNA-seq data from genotypes from <b>unrelated</b> individuals ( <b>LWK</b> population). |
| Genotypes | HG01119<br>HG01121<br>HG01122<br>HG01130<br>HG01131<br>HG01142<br>HG01133<br>HG01134<br>HG01136<br>HG01137<br>HG01139 | The 1000 Genomes Project Consortium, Nature, 2015. | Kinship detection using simulated RNA-seq data from genotypes from <b>unrelated</b> individuals ( <b>CLM</b> population). |
| Genotypes | HG00759<br>HG00766<br>HG00844<br>HG00851<br>HG00864<br>HG00867<br>HG00978<br>HG00982<br>HG01028<br>HG01029<br>HG01031 | The 1000 Genomes Project Consortium, Nature, 2015. | Kinship detection using simulated RNA-seq data from genotypes from <b>unrelated</b> individuals ( <b>CLX</b> population). |
| Genotypes | HG01961                                                                                                               | The 1000 Genomes                                   | Kinship detection using                                                                                                   |

|           |                                                                                                                                                                                                                          |                                                          |                                                                                                                                                                |
|-----------|--------------------------------------------------------------------------------------------------------------------------------------------------------------------------------------------------------------------------|----------------------------------------------------------|----------------------------------------------------------------------------------------------------------------------------------------------------------------|
|           | HG01965<br>HG02006<br>HG02102<br>HG02150<br>HG02252<br>HG02262<br>HG02265<br>HG02266<br>HG02274<br>HG02275                                                                                                               | Project Consortium,<br>Nature, 2015.                     | simulated RNA-seq data from<br>genotypes from <b>unrelated</b><br>individuals ( <b>PEL</b> population).                                                        |
| Genotypes | HG01985<br>HG02051<br>HG02052<br>HG02095<br>HG02111<br>HG02283<br>HG02330<br>HG02332<br>HG02334<br>HG02337<br>HG02339                                                                                                    | The 1000 Genomes<br>Project Consortium,<br>Nature, 2015. | Kinship detection using<br>simulated RNA-seq data from<br>genotypes from <b>unrelated</b><br>individuals ( <b>ACB</b> population).                             |
| Genotypes | HG01500<br>HG01501<br>HG01503<br>HG01504<br>HG01506<br>HG01767<br>HG01768<br>HG01785<br>HG01786<br>HG02219<br>HG01507<br>HG01509<br>HG01510<br>HG01512<br>HG01513<br>HG01515<br>HG01516<br>HG01518<br>HG01519<br>HG01521 | The 1000 Genomes<br>Project Consortium,<br>Nature, 2015. | Identification of a pair of<br>RNA-seq samples from<br>related individuals in a<br>dataset containing 20<br>unrelated individuals ( <b>IBS</b><br>population). |

**Supplementary Table 2.** The effect of SNP filtering on the range of number of SNPs used for IBD estimation, the true positive rate of genotype calls for RNA-seq samples from individuals NA12877 and NA12878 from the CEPH/UTAH family 1463, the clustering of samples in ternary diagrams and pedigree reconstruction of family 1463 using PRIMUS.

| <i>Filter</i> | <i>minimum<br/>number of<br/>SNPs used<br/>for IBD<br/>estimation</i> | <i>maximum<br/>number of<br/>SNPs used<br/>for IBD<br/>estimation</i> | <i>% correctly<br/>predicted<br/>genotypes<br/>(NA12878)</i> | <i>% correctly<br/>predicted<br/>genotypes<br/>(NA12877)</i> | <i>Incorrect<br/>clustering of<br/>samples in<br/>ternary diagram</i> | <i>Pedigree<br/>predicted<br/>correctly</i> |
|---------------|-----------------------------------------------------------------------|-----------------------------------------------------------------------|--------------------------------------------------------------|--------------------------------------------------------------|-----------------------------------------------------------------------|---------------------------------------------|
|               |                                                                       |                                                                       |                                                              |                                                              |                                                                       |                                             |

|                        |      |      |       |       |    |     |
|------------------------|------|------|-------|-------|----|-----|
| None                   | 6248 | 9901 | 99.21 | 98.66 | no | yes |
| Imprinted genes        | 6227 | 9877 | 99.23 | 98.74 | no | yes |
| Repeats                | 5680 | 8621 | 99.30 | 98.72 | no | yes |
| Segmental duplications | 5638 | 8929 | 99.45 | 98.95 | no | yes |

**Supplementary Table 3.** Expected IBD probabilities of different relationships and degrees of relatedness. Z0, Z1 and Z2 represent the probabilities that a pair of individuals share 0, 1 or 2 identical by descent alleles respectively.

| <i>Degree</i> | <i>Relationship</i>                                                 | <i>Z0</i> | <i>Z1</i> | <i>Z2</i> |
|---------------|---------------------------------------------------------------------|-----------|-----------|-----------|
| 1             | parent-offspring                                                    | 0         | 1         | 0         |
|               | full-siblings                                                       | 0.25      | 0.5       | 0.25      |
| 2             | grandparental, avuncular, half-siblings                             | 0.5       | 0.5       | 0         |
| 3             | First-cousins, great-grandparental, great-avuncular, half-avuncular | 0.75      | 0.25      | 0         |
| $\infty$      | unrelated                                                           | 1         | 0         | 0         |

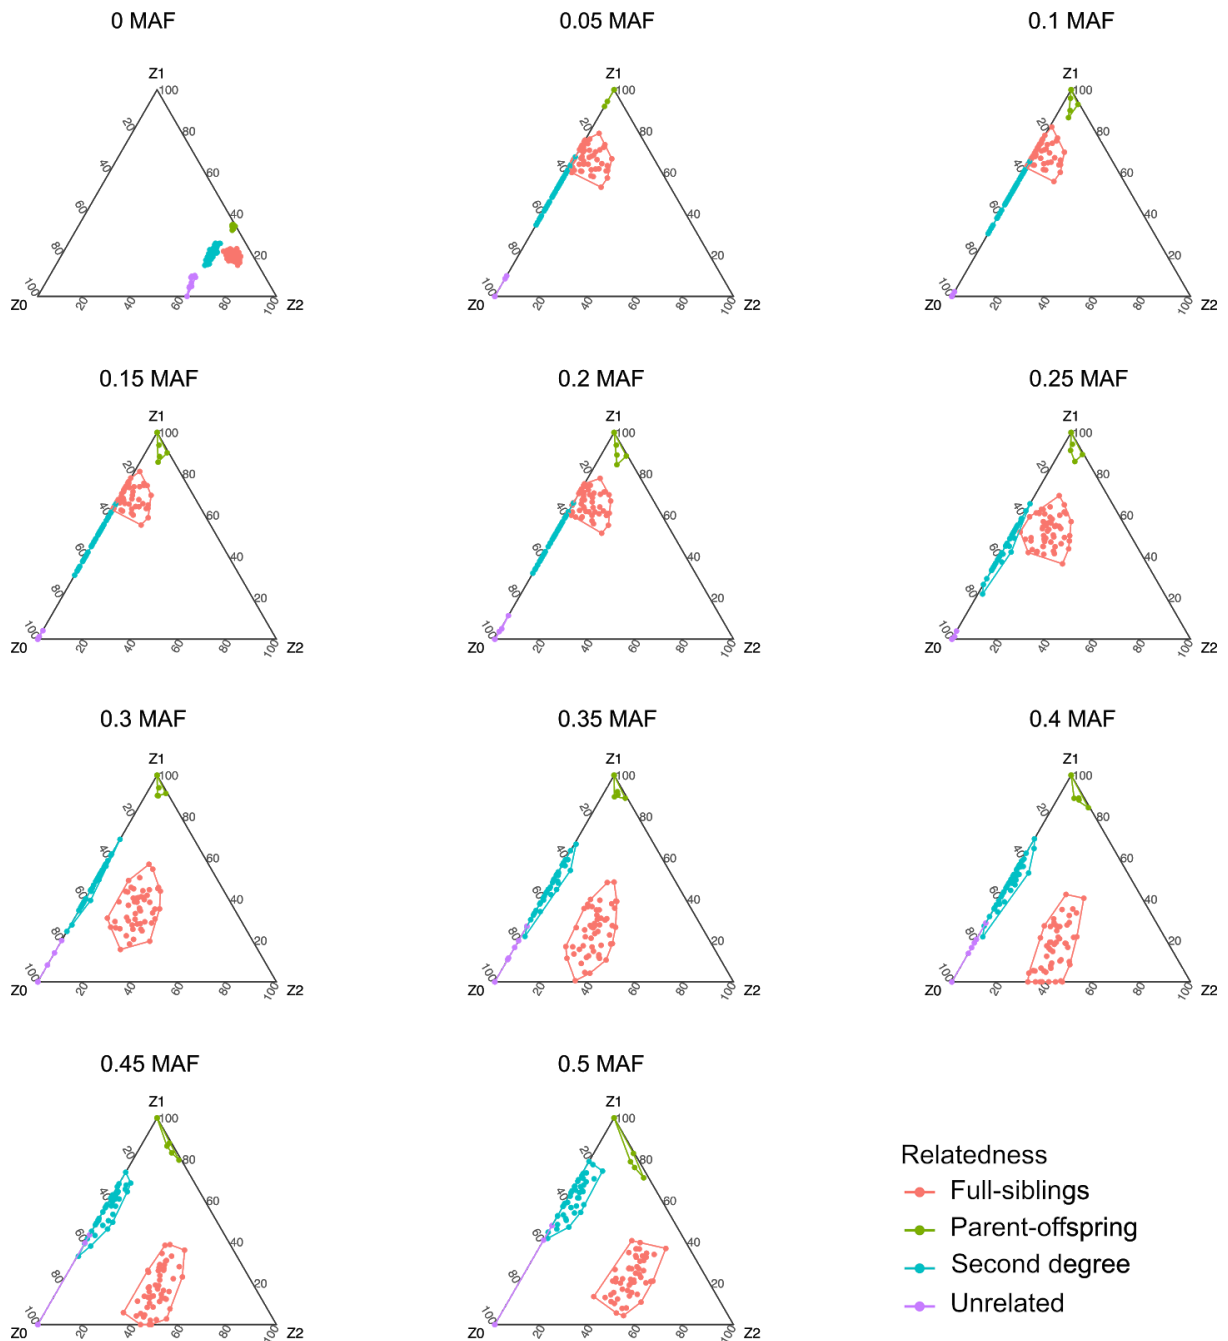

**Supplementary Figure 1:** Ternary diagrams of IBD estimates for CEPH/UTAH family 1463 using a minor allele frequency threshold ranging from 0 to 0.5.

A. RNA-seq dataset from iPSC-derived cardiomyocytes from two parents and an offspring.

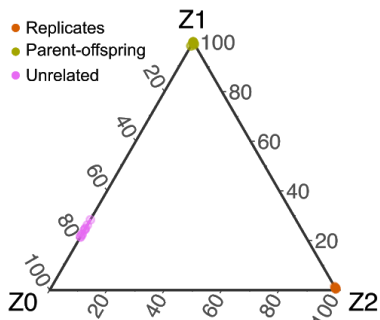

B. RNA-seq dataset from whole blood from a parent, an offspring and two unrelated individuals.

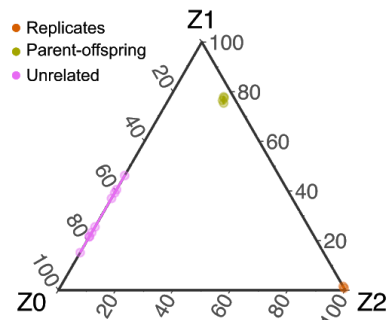

C. RNA-seq dataset from peripheral blood mononuclear cells from a parent, an offspring and an unrelated individual.

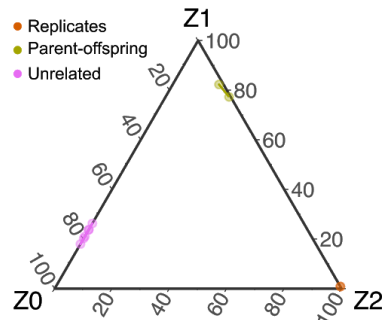

D. Targeted RNA-seq dataset from LPS-stimulated monocytes from a pair of siblings and seven unrelated individuals.

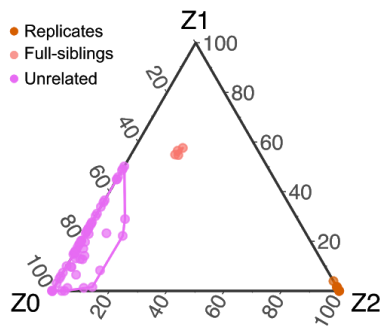

E. Targeted RNA-seq dataset from naive CD4+ T-cells from eight unrelated individuals.

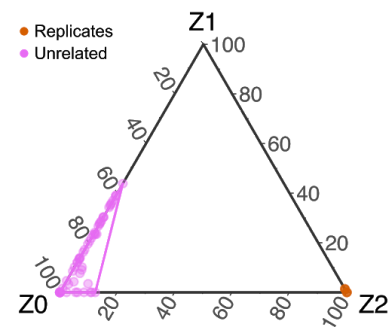

**Supplementary Figure 2:** Ternary diagrams of IBD estimates from empirical RNA-seq datasets from related and unrelated individuals (A-E). Data from Gifford *et al* Science 2019 (A), Oda *et al* Front Immunol 2019 (B,C) and Boutboul *et al* J Clin Invest 2018 (D,E).



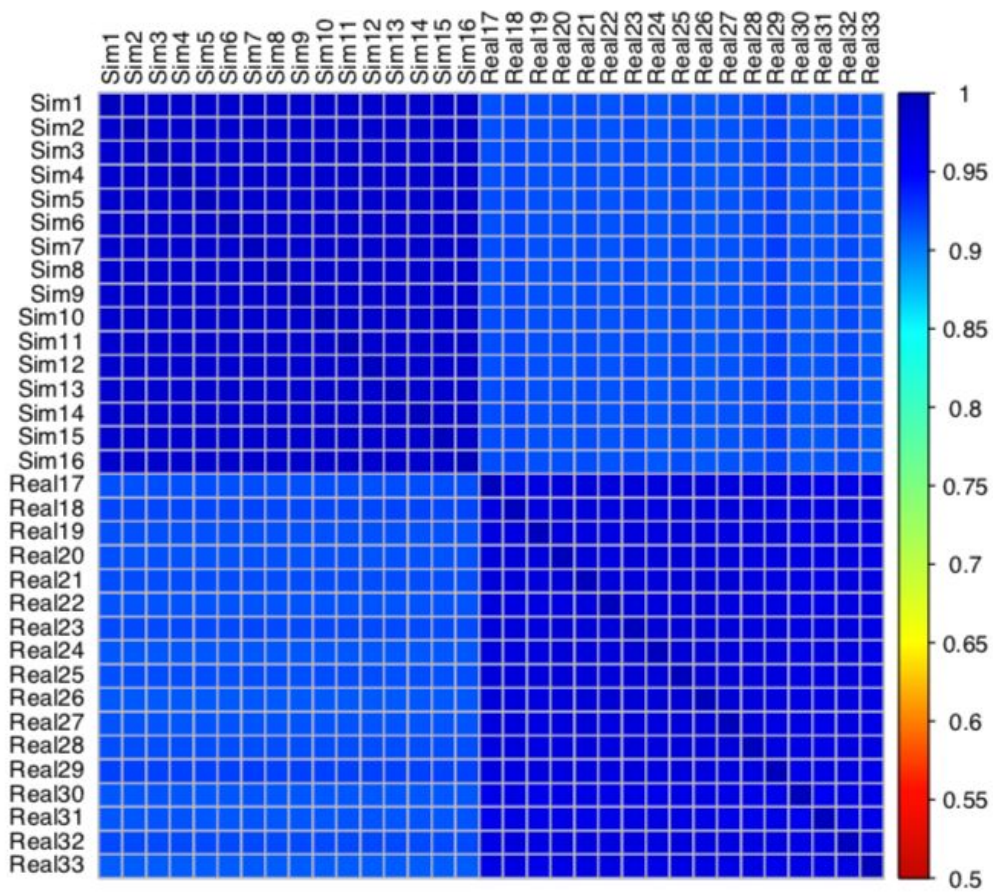

**Supplementary Figure 3.** Correlation matrix of the number of reads per gene in logarithmic scale between Simulated data (Sim1 - Sim16: individuals 1 - 16 of a type 1 simulated family) and Real data (Real1 - Real17: SRR1258217 - SRR1258233). Mean correlation between Real data: 0.975, between Simulated data: 0.988, between Real data and Simulated data: 0.918.

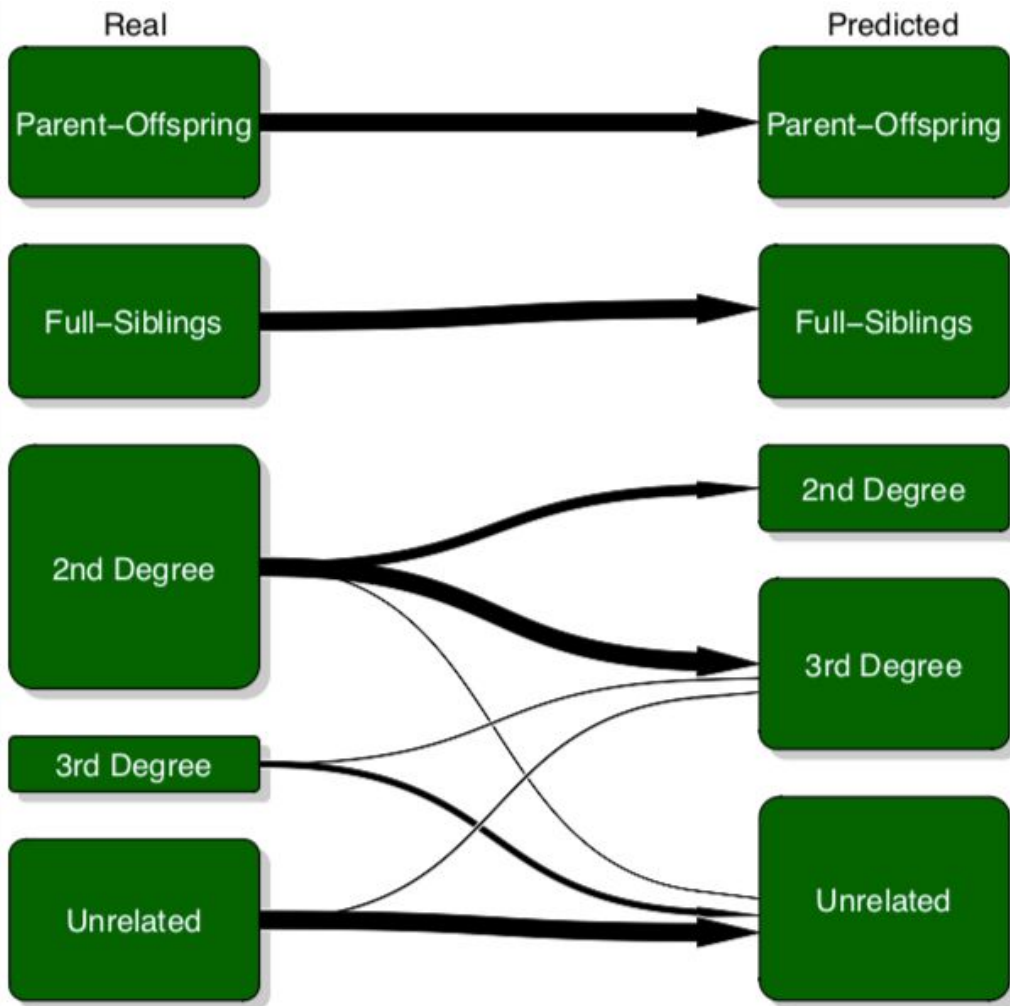

**Supplementary Figure 4:** Kinship classification by PRIMUS for simulated families (pairs with higher than third degree relationship are represented here as unrelated).

A. Simulated RNA-seq dataset of 20 unrelated individuals and a pair of second degree relatives.

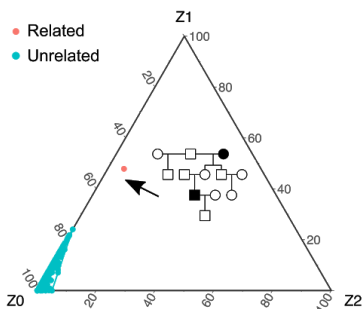

B. Simulated RNA-seq dataset of 20 unrelated individuals and a pair of third degree relatives.

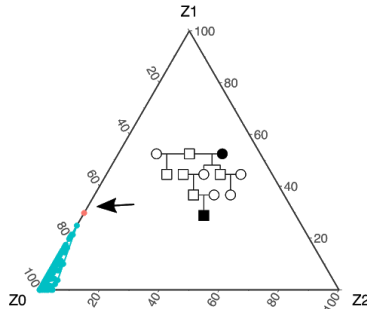

C. Simulated RNA-seq dataset of 20 unrelated individuals and a pair of third degree relatives.

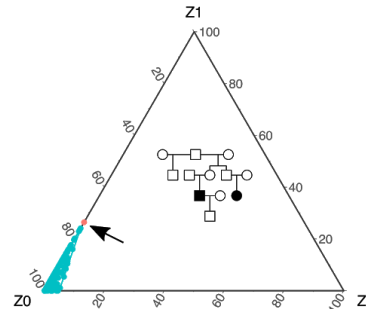

D. Simulated RNA-seq dataset of unrelated individuals and a pair of fourth degree relatives.

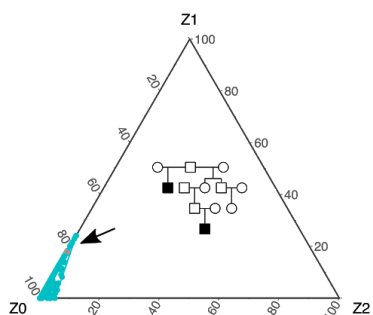

E. Simulated RNA-seq dataset of 20 unrelated individuals and a pair of fourth degree relatives.

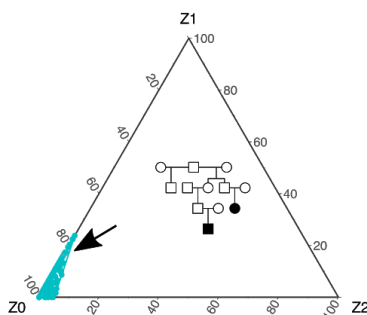

**Supplementary Figure 5:** Use of kinship detection for identification of RNA-seq samples from related individuals within a larger datasets of samples from unrelated individuals. Ternary diagrams of IBD estimates for simulated RNA-seq samples from twenty unrelated individuals from the IBS population and a pair of related individuals from a type 4 simulated pedigree (A-E). The pair of related individuals from the pedigree used to spike the dataset of 20 unrelated individuals is shown in black in the pedigree inside each ternary diagram.

A. Simulated RNA-seq dataset of 20 unrelated individuals and a pair of second degree relatives.

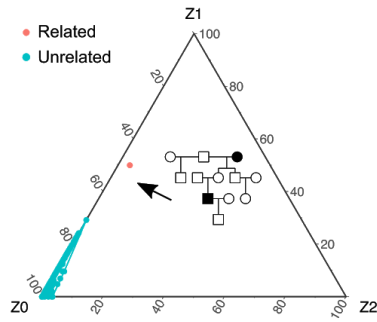

B. Simulated RNA-seq dataset of 20 unrelated individuals and a pair of third degree relatives.

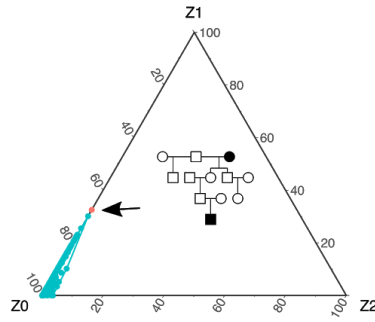

C. Simulated RNA-seq dataset of 20 unrelated individuals and a pair of third degree relatives.

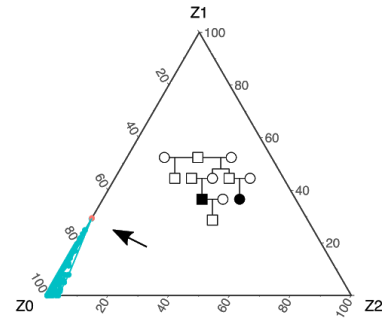

D. Simulated RNA-seq dataset of unrelated individuals and a pair of fourth degree relatives.

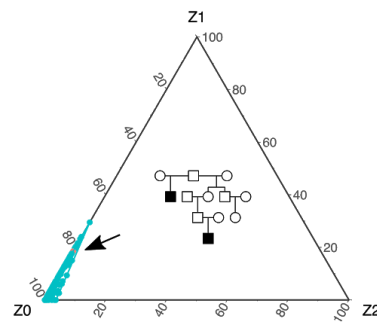

E. Simulated RNA-seq dataset of 20 unrelated individuals and a pair of fourth degree relatives.

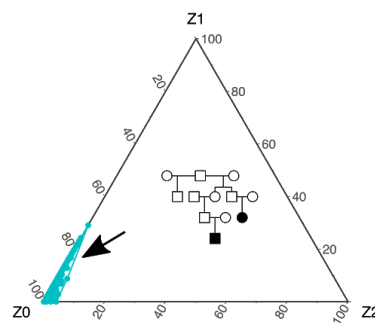

**Supplementary Figure 6:** Ternary diagrams of IBD estimates from simulated RNA-seq datasets consisting of samples from twenty unrelated and a pair of related individuals from the IBS population (genotypes retrieved from the 1000 Genome Project), after removing variants in imprinted genes, repeats and also human segmental duplications from She et al, Nature 2014. The pedigree and five ternary diagrams (A-E) correspond to the same simulated datasets shown in Supplementary Figure 3.
